# Supplementary material for: Host reproductive cycle influences the pouch microbiota of wild Southern Hairy-nosed Wombats (Lasiorhinus latifrons)
Source: Research Square preprint supplement (doi:10.21203/rs.3.rs-28743/v3), 2021-01-05
Supplement: Supplementary file 1 [file 2357300de826d180219bc491.docx]

SI figure 1: A Southern Hairy-nosed Wombat (*Lasiorhinus latifrons*) photographed at the study site.

SI figure 2: Histogram of decontam scores.

SI figure 3: Prevalence/prevalence plot of taxa identified in biological samples vs negative controls. Taxa identified as putative contaminants (>0.5 decontam score) are coloured blue.

SI figure 4: Heatmap of taxa found in pouch/joey samples.
